# Supplementary material
Source: PubMed Central journal article supplement (PMC6434135)
Supplement: IAI.00643-18-s0001.pdf [file IAI.00643-18-s0001.pdf]

## Supplementary Materials

### Supplementary Table

**Table S1. List of qPCR primers**

| <i>Gene</i>                   | <i>Primer sequences</i>                              |
|-------------------------------|------------------------------------------------------|
| <i>GAPDH</i>                  | AGGTCGGTGAACGGATTTG<br>GGGGTCGTTGATGGCAACA           |
| <i>IL-6</i>                   | TAGTCCTTCCTACCCCAATTTCC<br>TTGGTCCTTAGCCACTCCTTC     |
| <i>iNOS</i>                   | GTTCTCAGCCCAACAATACAAGA<br>GTGGACGGGTCGATGTCAC       |
| <i>TLR2</i>                   | GCAAACGCTGTTCTGCTCAG<br>AGGCGTCTCCCTCTATTGTATT       |
| <i>TLR9</i>                   | ATGGTTCTCCGTCGAAGGACT<br>GAGGCTTCAGCTCACAGGG         |
| <i>IL-1<math>\beta</math></i> | GCAACTGTTCTGAACTCAACT<br>ATCTTTTGGGGTCCGTCAACT       |
| <i>NOD2</i>                   | CAGGTCTCCGAGAGGGTACTG<br>GCTACGGATGAGCCAAATGAAG      |
| <i>KLF2</i>                   | ACAGACTGCTATTTATTGGACCTTAG<br>CAGAACTGGTGGCAGAGTCATT |

## Supplementary Figures

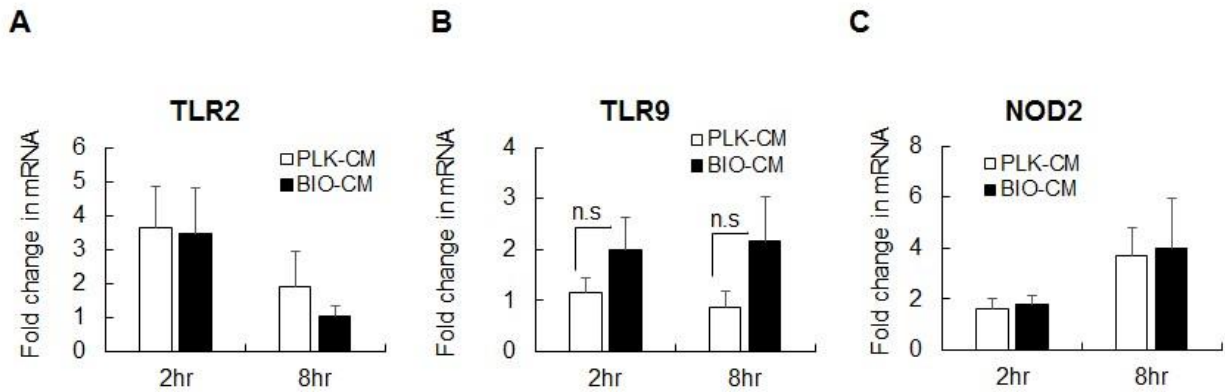

**Figure S1. Effects of *S. aureus* biofilm on the expression of TLR2, TLR9, and NOD2 in RAW 264.7 macrophages.** RAW 264.7 cells were treated with conditioned medium from planktonic culture (PLK-CM) or biofilm culture (BIO-CM) of *S. aureus* for the indicated time. qPCR analysis of TLR 2 (A), TLR 9 (B), and NOD 2 (C) mRNAs from RAW 264.7 cells following 2 or 8 hour treatment of PLK-CM or BIO-CM. n.s: not significant,  $p > 0.05$ .  $N = 6-8$ . Data are presented as mean  $\pm$  SE.

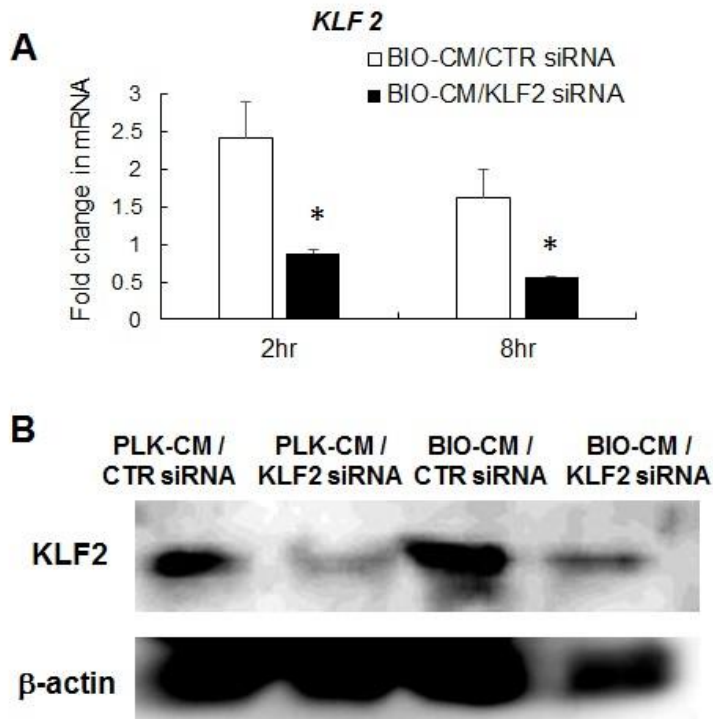

**Figure S2. siRNA mediated knockdown of KLF2 gene in RAW 264.7 cells.** RAW 264.7 cells were transfected with KLF2 siRNA or scrambled control siRNA (CTR siRNA), and cells were exposed to conditioned medium collected from a biofilm culture of *S. aureus* (BIO-CM). A. qPCR analysis for the expression of KLF2 mRNA from RAW 264.7 macrophages transfected with control (CTR) siRNA or KLF2 siRNA following the exposure of BIO-CM for 2 or 8 hours. N=6 per group. Data are presented as mean  $\pm$  SE. \*:  $p < 0.05$  vs. BIO-CM/CTR siRNA group. B. Representative western blot images for the expression of the KLF2 protein at 8hrs.  $\beta$ -actin expression was used as a housekeeping control. Results are representative of three independent experiments.
